# Supplementary material for: Quantum-Resistant FAIL on Blockchain for Evaluation of Performance Metrics in Creation of Distributed Ledgers
Source: Research Square preprint supplement (doi:10.21203/rs.3.rs-8391944/v1), 2026-01-20
Supplement: Supplementary file 1 [file 57fba684917fef55ae94bee9.docx]

**Data Availability Statement and Direct Links**

MNIST dataset

<https://www.kaggle.com/datasets/oddrationale/mnist-in-csv?utm_source=chatgpt.com>

CIFAR-10 dataset

<https://www.kaggle.com/datasets/muhammadhamza966/cifar10-in-csv>

synthetic IoT dataset

<https://www.kaggle.com/datasets/canozensoy/industrial-iot-dataset-synthetic?utm_source=chatgpt.com>

No publicly available or proprietary datasets were used or generated in this study. The experimental evaluation was conducted using MIST, CIFAR-10. Synthetic IOT datasets used. And that links are given in the above within a federated learning environment to preserve data privacy and confidentiality. All performance metrics, simulation parameters, and experimental configurations required to reproduce the results are described in detail in the manuscript. Any source code, configuration scripts, and non-sensitive logs supporting the findings of this study can be made available by the first author upon reasonable request

The data availability used to work and support the findings of these results used as MIST, CIFAR-10. Synthetic IOT datasets used. The datasets were generated or processed as part of this research and do not contain or misleading any personally identifiable information. No proprietary or restricted-access data were used in this work.
